# Supplementary material for: Structural optimization of novel one-dimensional composites based on in situ – grown 1D CNTs with an amorphous structure and 2D MoS2 nanosheets for improved Li storage
Source: Royal Society of Chemistry journal article supplement (doi:10.1039/d4ce00382a), 2024-01-01
Supplement: d4ce00382a1.pdf [file d4ce00382a1.pdf]

# **Structural Optimization of Novel One-Dimensional Composite Based on In-situ Grown 1D CNTs with Amorphous Structure and 2D MoS<sub>2</sub> Nanosheets for Improved Li Storage**

Zhiming Cheng<sup>1</sup>, Zunxian Yang<sup>\*,1,2</sup>, Yuliang Ye<sup>1</sup>, Songwei Ye<sup>1</sup>, Hongyi Hong<sup>1</sup>, Zhiwei Zeng<sup>1</sup>, Zongyi Meng<sup>1</sup>, Qianting Lan<sup>1</sup>, Hui Zhang<sup>1</sup>, Ye Chen<sup>1</sup>, Jiaxiang Wang<sup>1</sup>, Yuting Bai<sup>1</sup>, Xudong Jiang<sup>1</sup>, Benfang Liu<sup>1</sup>, Jiajie Hong<sup>1</sup>, Tailiang Guo<sup>1,2</sup>, Zhenzhen Weng<sup>3</sup>, Yongyi Chen<sup>3</sup>

<sup>1</sup>National & Local United Engineering Research Center of Flat Panel Display Technology, Fuzhou University, Fuzhou 350108, P. R. China.

<sup>2</sup>Mindu Innovation Laboratory, Fujian Science & Technology Innovation Laboratory For Optoelectronic Information of China, Fuzhou, 350108, P.R. China

<sup>3</sup>Department of Physics, School of Physics and Information Engineering, Fuzhou University

## **Supporting Information**

---

\* Corresponding author should be addressed. Tel.: +86 591 8789 3299; Fax: +86 591 8789 2643  
E-mail: yangzunxian@hotmail.com (Z. Yang)

## Captions

**Table S1** Specific surface area of MoS<sub>2</sub>@C-L and MoS<sub>2</sub>@C-H.

**Table S2** EIS Fitting resistance of MoS<sub>2</sub>@C, MoS<sub>2</sub>@C-L and MoS<sub>2</sub>@C-H.

**Fig.S1** SEM images of (a,e) MoS<sub>2</sub>@C-L,(b,e) MoS<sub>2</sub>@C,(c,e) MoS<sub>2</sub>@C-H.

**Fig.S2** EDS mapping of MoS<sub>2</sub>@C (b) C, (c) Mo, (c) S.

**Fig.S3** SEM images of (a) MoS<sub>2</sub>@C-L,(b) MoS<sub>2</sub>@C-L2,(c) MoS<sub>2</sub>@C-L4, (d)MoS<sub>2</sub>@C-L8, (e) MoS<sub>2</sub>@C-L12, (f) MoS<sub>2</sub>@C-L.

**Fig.S4** SEM images of (a) MoS<sub>2</sub>@C-H1, (b) MoS<sub>2</sub>@C-H2, (c) MoS<sub>2</sub>@C-H4, (d) MoS<sub>2</sub>@C-H8, (e)MoS<sub>2</sub>@C-H12, (f) MoS<sub>2</sub>@C-H.

**Fig.S5** XRD patterns of (a) MoS<sub>2</sub>@C-L,(b) MoS<sub>2</sub>@C-H.

**Fig.S6** Raman spectra of MoS<sub>2</sub>@C.

**Fig.S7** TGA result of MoS<sub>2</sub>@C.

**Fig.S8** Rate capability of MoS<sub>2</sub>@C cycled at various rates from 0.1 to 5.0 Ag<sup>-1</sup>.

**Fig.S9** MoS<sub>2</sub>@C-L8, MoS<sub>2</sub>@C-L12 and MoS<sub>2</sub>@C-L at a current density of (a) 0.2 Ag<sup>-1</sup>, (b) 1Ag<sup>-1</sup>.

**Fig.S10** MoS<sub>2</sub>@C-H8, MoS<sub>2</sub>@C-H12 and MoS<sub>2</sub>@C-H at a current density of (a) 0.2 Ag<sup>-1</sup>, (b) 1Ag<sup>-1</sup>.

**Fig.S11** EIS of (a) MoS<sub>2</sub>@C-L8, MoS<sub>2</sub>@C-L12 and MoS<sub>2</sub>@C-L,(b) MoS<sub>2</sub>@C-H8, MoS<sub>2</sub>@C-H12 and MoS<sub>2</sub>@C-H.

**Table S1**

|                                                                                                                                                     | <b>MoS<sub>2</sub>@C-L</b> | <b>MoS<sub>2</sub>@C-H</b> |
|-----------------------------------------------------------------------------------------------------------------------------------------------------|----------------------------|----------------------------|
| BET Surface Area(m <sup>2</sup> g <sup>-1</sup> )                                                                                                   | 64.3534                    | 35.1899                    |
| Langmuir Surface Area(m <sup>2</sup> g <sup>-1</sup> )                                                                                              | 65.7454                    | 27.2338                    |
| Adsorption average pore size (nm <sup>2</sup> )                                                                                                     | 5.48244                    | 5.19043                    |
| BJH Adsorption mean hole width(nm <sup>2</sup> )                                                                                                    | 14.7987                    | 8.5994                     |
| BJH Desorption Mean Pore width(nm <sup>2</sup> )                                                                                                    | 5.9646                     | 6.4407                     |
| Single point adsorption total pore volume of pores less than 40.4123 nm <sup>2</sup> width at P/Po = 0.950000000 (cm <sup>3</sup> g <sup>-1</sup> ) | 0.088203                   | 0.045663                   |
| correlation coefficient                                                                                                                             | 0.9999159                  | 0.9998018                  |

**Table S2**

|                              | <b>Rf(Ω)</b> | <b>Rct(Ω)</b> |
|------------------------------|--------------|---------------|
| <b>MoS<sub>2</sub>@C</b>     | 449.5        | 72.3          |
| <b>MoS<sub>2</sub>@C-L8</b>  | 1368         | 696           |
| <b>MoS<sub>2</sub>@C-L12</b> | 867.4        | 263.8         |
| <b>MoS<sub>2</sub>@C-L</b>   | 937.5        | 342.4         |
| <b>MoS<sub>2</sub>@C-H8</b>  | 538          | 137.1         |
| <b>MoS<sub>2</sub>@C-H12</b> | 1056         | 128.2         |
| <b>MoS<sub>2</sub>@C-H</b>   | 1449         | 180           |

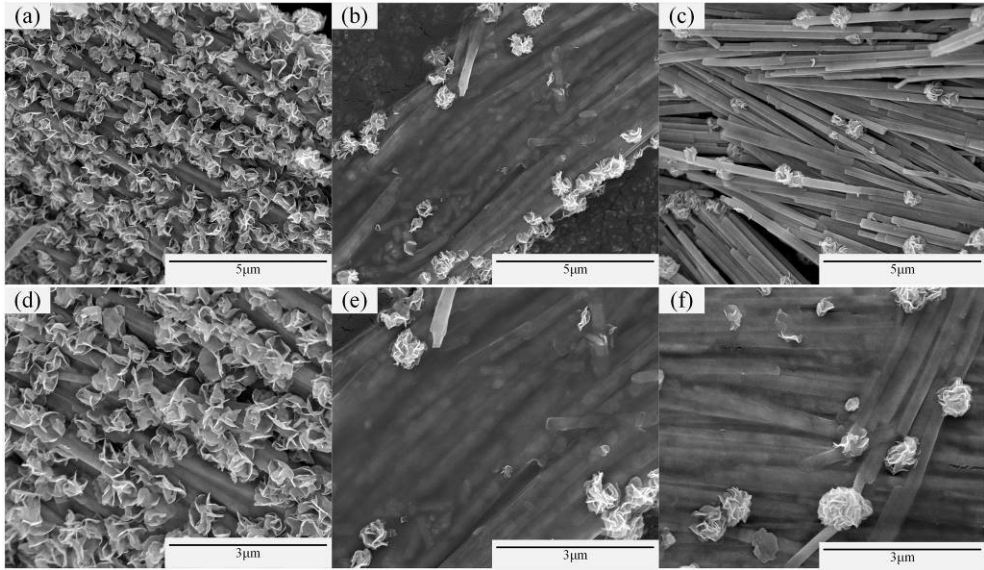

**Fig.S1**

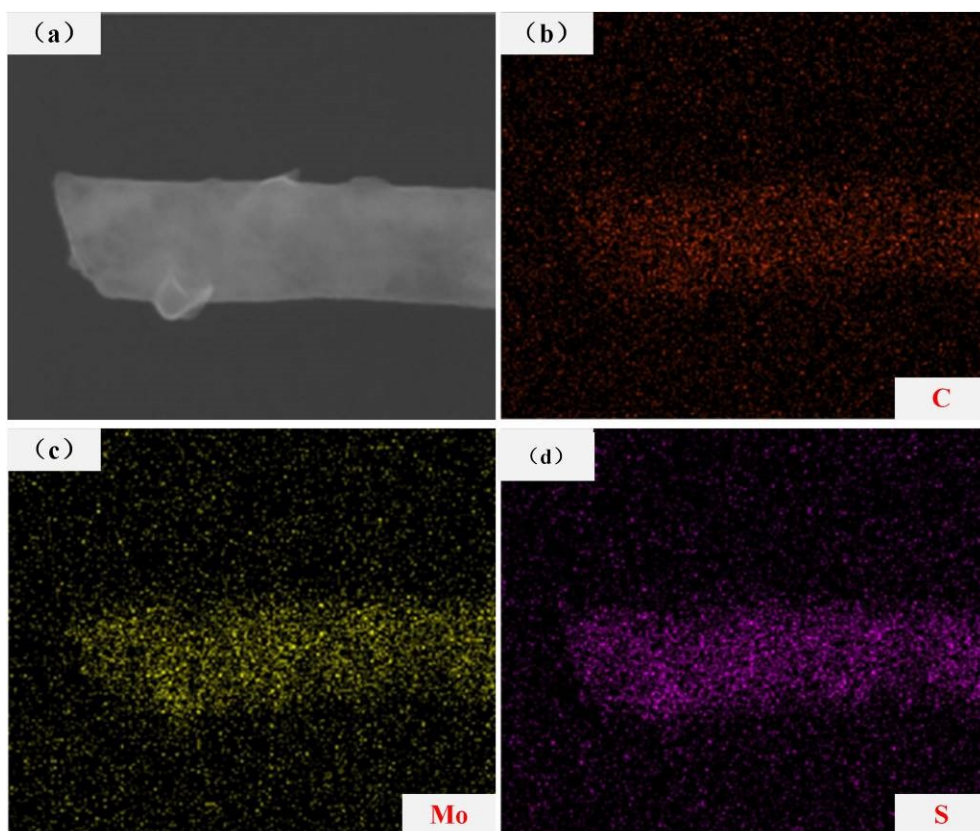

**Fig.S2**

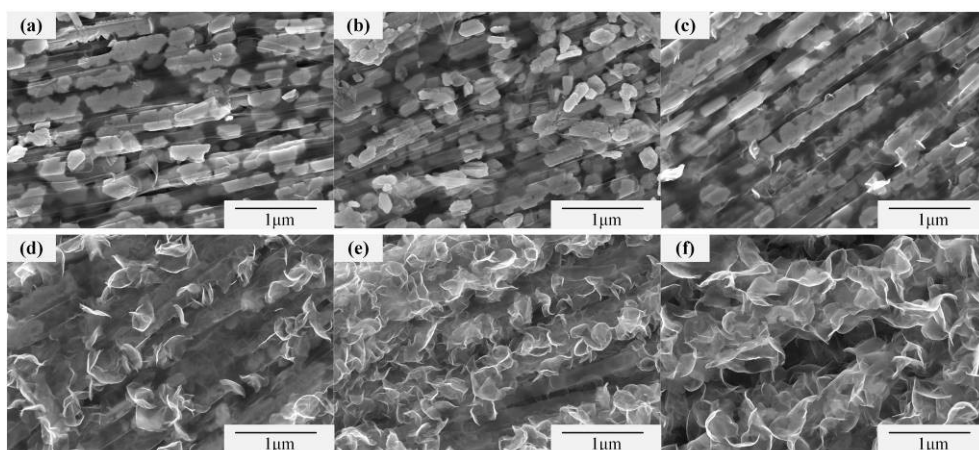

**Fig.S3**

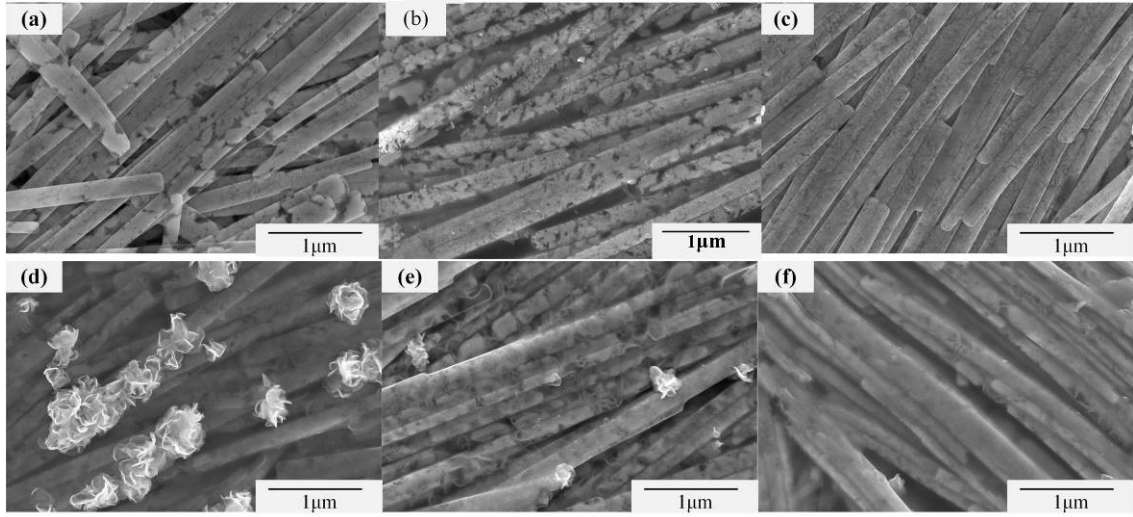

**Fig.S4**



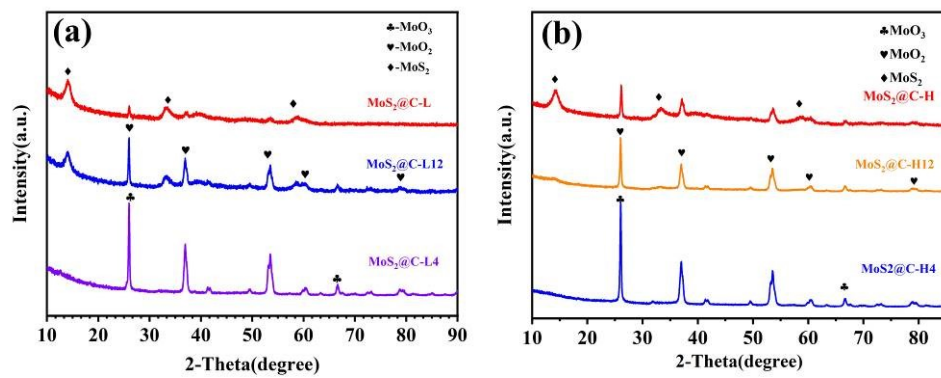

Fig.S5

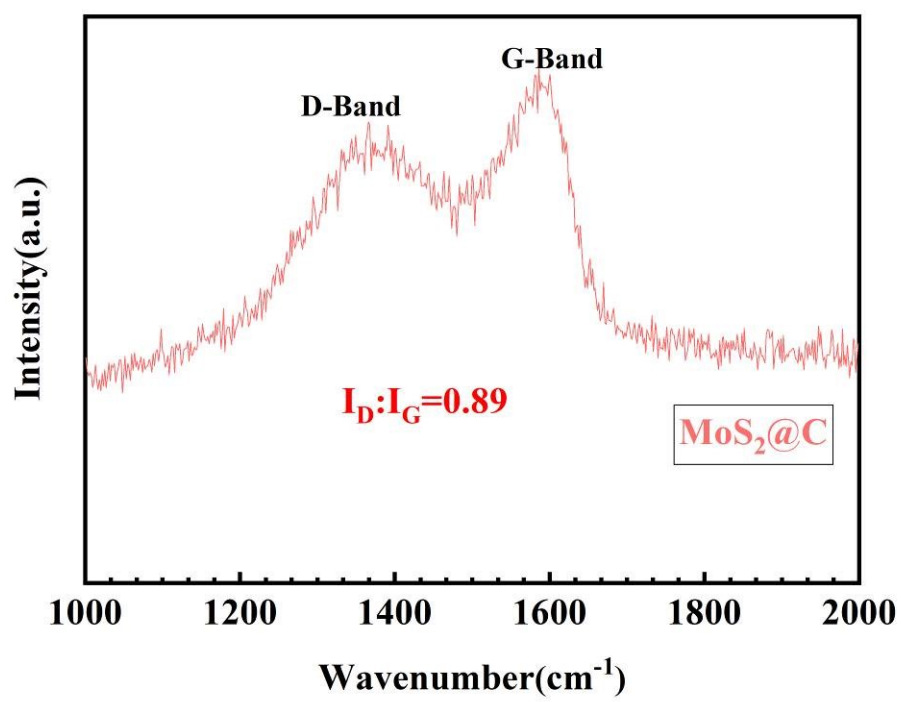

Fig.S6

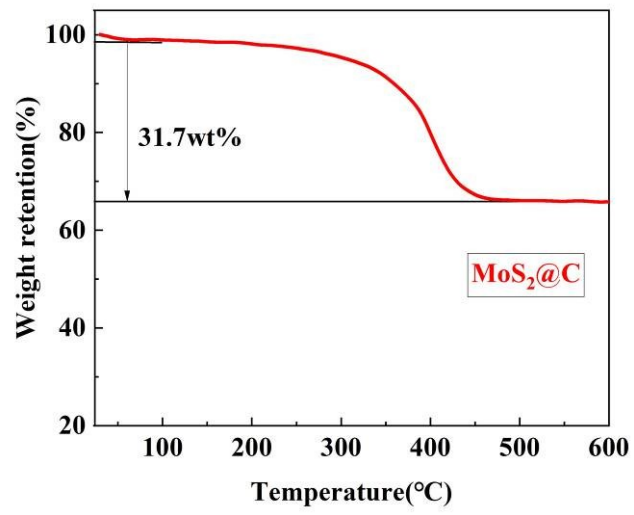

Fig.S7

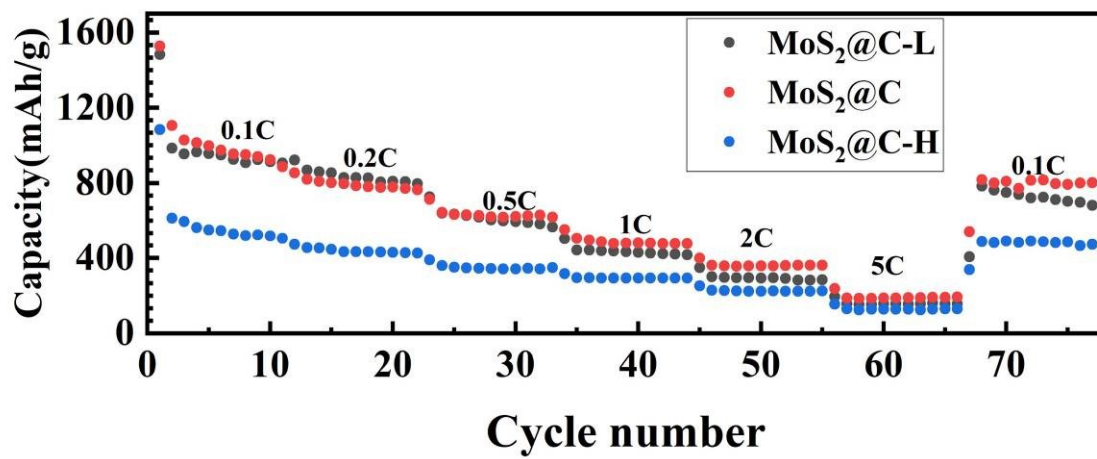

Fig.S8

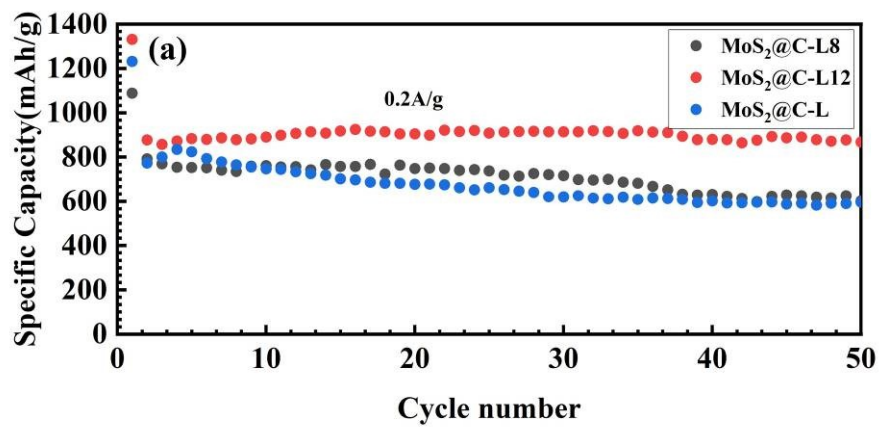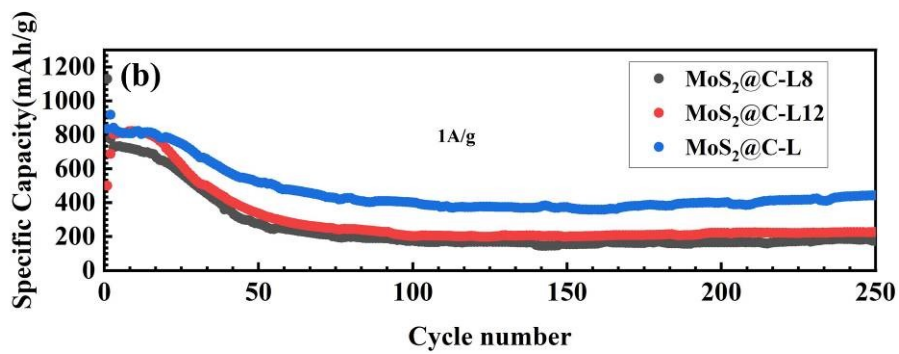

Fig.S9

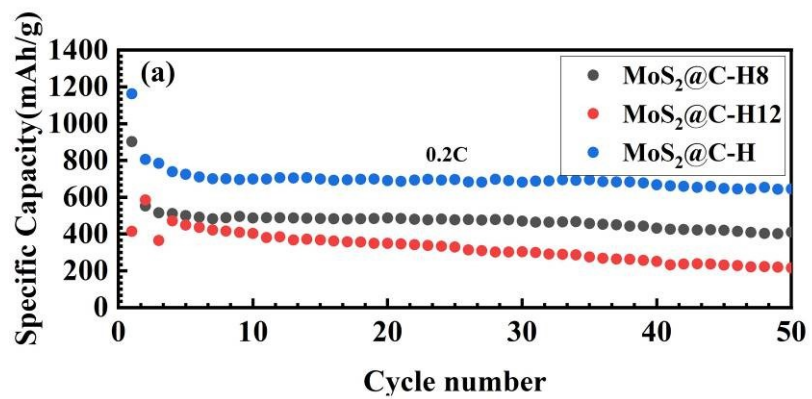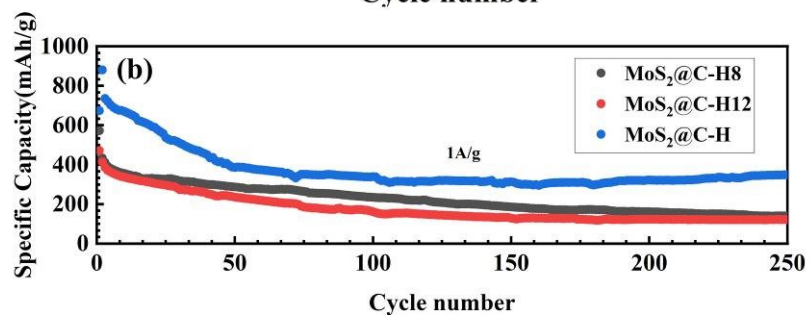

Fig.S10

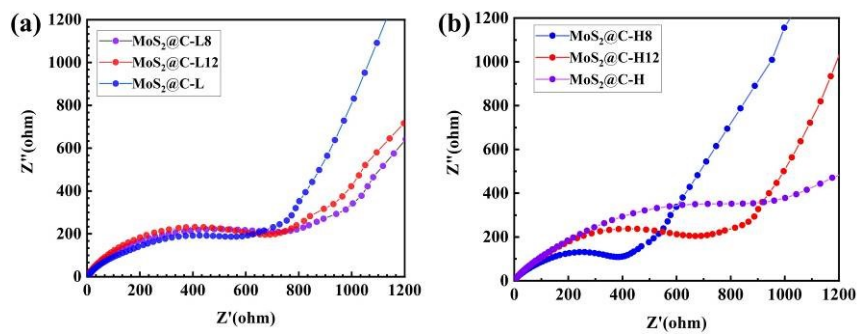

Fig.S11
